# Supplementary material
Source: PubMed Central journal article supplement (PMC9264240)
Supplement: jamaotolaryngolheadnecksurg-e221573-s00.pdf [file jamaotolaryngolheadnecksurg-e221573-s00.pdf]

## Data Sharing Statement

Gupta. Efficacy and Safety of Saline Nasal Irrigation Plus Theophylline for Treatment of COVID-19-Related Olfactory Dysfunction. *JAMA Otolaryngol Head Neck Surg.* Published July 07, 2022. doi:10.1001/jamaoto.2022.1573

### Data

**Data available:** Yes

**Data types:** Deidentified participant data, Data dictionary

**How to access data:** Request from the corresponding author: [piccirij@wustl.edu](mailto:piccirij@wustl.edu)

**When available:** With publication

### Supporting Documents

**Document types:** None

### Additional Information

**Who can access the data:** Researchers whose proposed use of the data has been approved.

**Types of analyses:** For any purpose deemed appropriate by the corresponding author.

**Mechanisms of data availability:** With a signed data access agreement

**Any additional restrictions:** None
