# Supplementary material
Source: PubMed Central journal article supplement (PMC9264240)
Supplement: jamaotolaryngolheadnecksurg-e221573-s002.pdf [file jamaotolaryngolheadnecksurg-e221573-s002.pdf]

## Supplemental Online Content

Gupta S, Lee JJ, Perrin A, et al. Efficacy and safety of saline nasal irrigation plus theophylline for treatment of COVID-19–related olfactory dysfunction: the SCENT2 phase 2 randomized clinical trial. *JAMA Otolaryngol Head Neck Surg*. Published July 7, 2022.  
doi:10.1001/jamaoto.2022.1573

**eTable 1.** Report of COVID-19 Infection Symptoms and Severity of Disease for the 51 Enrolled Patients With Chronic Olfactory Dysfunction

**eTable 2.** Side Effects as Reported by the Patients Who Completed the Study

This supplemental material has been provided by the authors to give readers additional information about their work.

eTable 1. Report of COVID-19 Infection Symptoms and Severity of Disease for the 51 Enrolled Patients With Chronic Olfactory Dysfunction

| COVID Symptoms at Presentation                          | Number (%) of subjects that reported the symptom for the 51 enrolled subjects | Theophylline Arm (n=26) | Placebo Arm (n=25) |
|---------------------------------------------------------|-------------------------------------------------------------------------------|-------------------------|--------------------|
| New loss of smell                                       | 51 (100%)                                                                     | 26 (51%)                | 25 (49%)           |
| New loss of taste                                       | 45 (88%)                                                                      | 21 (47%)                | 24 (53%)           |
| Fatigue or tiredness                                    | 40 (78%)                                                                      | 18 (45%)                | 22 (55%)           |
| Headache                                                | 33 (65%)                                                                      | 16 (48%)                | 17 (52%)           |
| Muscle or body aches                                    | 31 (61%)                                                                      | 14 (45%)                | 17 (55%)           |
| Congestion or running nose                              | 30 (59%)                                                                      | 18 (60%)                | 12 (40%)           |
| Fever or Chills                                         | 24 (47%)                                                                      | 11 (46%)                | 13 (54%)           |
| Cough                                                   | 22 (43%)                                                                      | 12 (55%)                | 10 (45%)           |
| Diarrhea                                                | 14 (28%)                                                                      | 11 (79%)                | 3 (21%)            |
| Shortness of Breath                                     | 13 (26%)                                                                      | 8 (62%)                 | 5 (38%)            |
| Sore throat                                             | 8 (16%)                                                                       | 5 (63%)                 | 3 (37%)            |
| Nausea or Vomiting                                      | 6 (12%)                                                                       | 4 (67%)                 | 2 (33%)            |
| Severity of COVID Infection                             | Number (%) of the 51 enrolled subjects                                        |                         |                    |
| Only smell and/or taste loss                            | 7 (14%)                                                                       | 4 (57%)                 | 3 (43%)            |
| Mild symptoms (did not disrupt daily life)              | 18 (35%)                                                                      | 11 (61%)                | 7 (39%)            |
| Moderate symptoms (somewhat disrupted daily life)       | 23 (45%)                                                                      | 11 (48%)                | 12 (52%)           |
| Breathing concerns, requiring hospitalization, or worse | 3 (6%)                                                                        | 0 (0)                   | 3 (100%)           |

\*Percentages are calculate by row.

eTable 2. Side Effects as Reported by the Patients Who Completed the Study

|                 | Placebo Arm<br>(n=23) |         | Theophylline Arm<br>(n=22) |                |
|-----------------|-----------------------|---------|----------------------------|----------------|
|                 | 3 weeks               | 6 weeks | 3 weeks                    | 6 weeks        |
| Lightheadedness | 2                     | 1       | 2                          | 0              |
| Nausea          | 0                     | 1       | 1                          | 0              |
| Vomiting        | 0                     | 0       | 0                          | 0              |
| Diarrhea        | 0                     | 1       | 0                          | 1              |
| Abdominal pain  | 0                     | 2       | 1                          | 0              |
| Insomnia        | 0                     | 3       | 2                          | 2              |
| Tremors         | 1                     | 1       | 2                          | 0              |
| Tachycardia     | 3                     | 0       | 1                          | 1              |
| Arrhythmia      | 0                     | 0       | 0                          | 0              |
| Seizures        | 0                     | 0       | 0                          | 0              |
| Rash            | 0                     | 0       | 0                          | 0              |
| Other           | 1 <sup>a</sup>        | 0       | 0                          | 1 <sup>b</sup> |

<sup>a</sup> One patient reported unexplained swelling of his hands and feet. <sup>b</sup> One patient reported severe parosmia and fowl taste directly caused by the intervention.
